# Supplementary material for: MANF Promotes Differentiation and Migration of Neural Progenitor Cells with Potential Neural Regenerative Effects in Stroke
Source: PubMed Central journal article supplement — Mol Ther. 2017 Sep 21;26(1):238–55. doi: 10.1016/j.ymthe.2017.09.019 (PMC5763030; doi:10.1016/j.ymthe.2017.09.019), 2017-09-21
Supplement: mmc1.pdf [file mmc1.pdf]

YMTHE, Volume 26

## **Supplemental Information**

### **MANF Promotes Differentiation and Migration of Neural Progenitor Cells with Potential Neural Regenerative Effects in Stroke**

**Kuan-Yin Tseng, Jenni E. Anttila, Konstantin Khodosevich, Raimo K. Tuominen, Maria Lindahl, Andrii Domanskyi, and Mikko Airavaara**

A

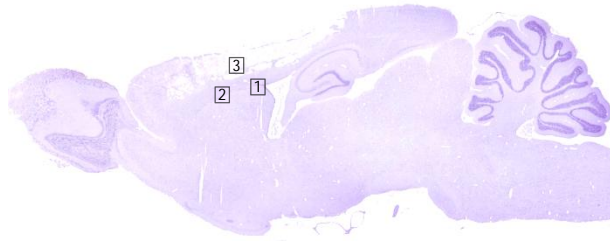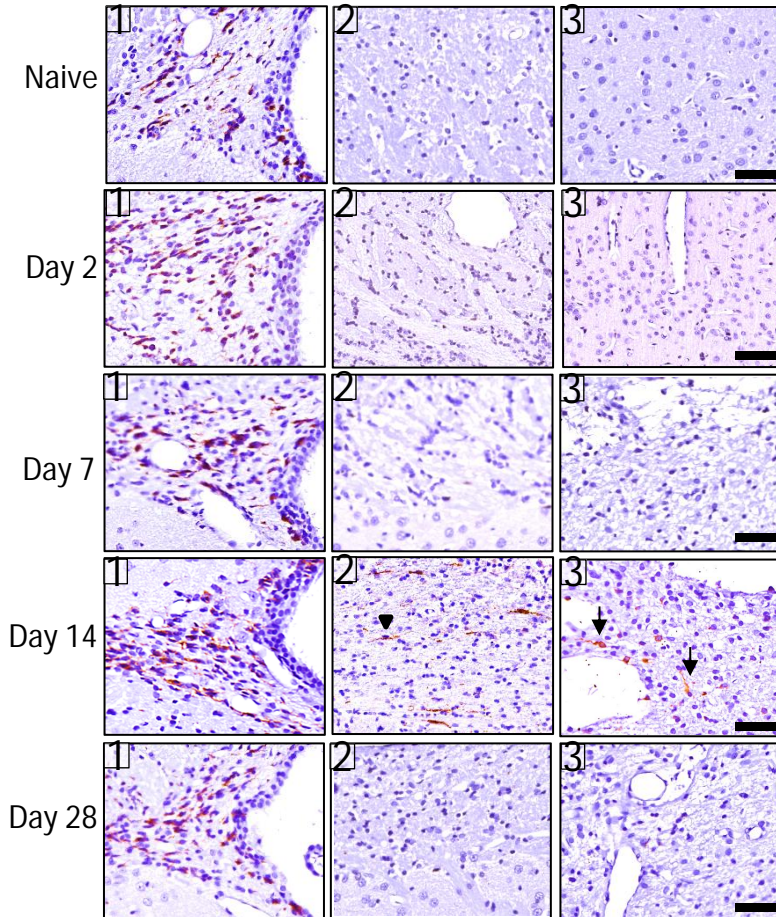

**Supp. Fig.1. A,** Distribution of DCX<sup>+</sup> cells in the SVZ, corpus callosum beneath the lesion area, and infarction zone at different time points after dMCAo. DCX<sup>+</sup> cells in the infarction zone and underlying white matter exhibit morphology characterized by leading and trailing processes (arrow). **B,** Quantification of the number of DCX<sup>+</sup> cells in different brain areas at different time points after stroke reveals a significant increase in the number of DCX<sup>+</sup> cells at 2 to 28 days post-stroke in the right SVZ compared to non-lesioned SVZ. A significant increase of DCX<sup>+</sup> cells was also found in the corpus callosum at post-injury day 14 rats compared to other post-stroke days (n=3-4, 2-way ANOVA time x brain area  $p < 0.001$ ; \*\*\*  $p < 0.001$ , \*  $p < 0.05$  Tukey's post hoc test, scale bar 50  $\mu\text{m}$ ).

B

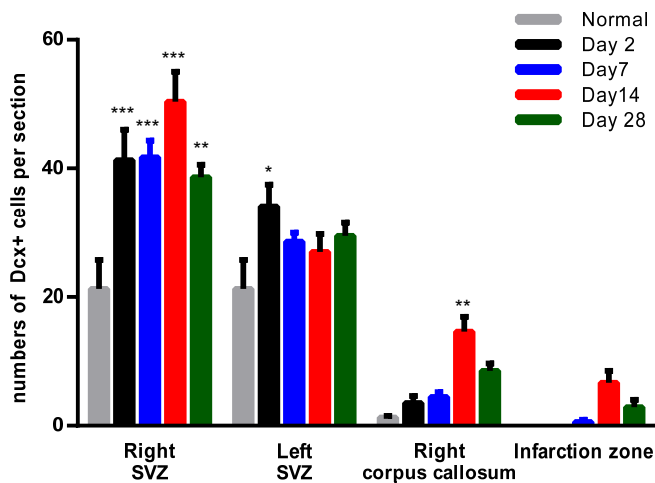

Details of the used antibodies.

| Antibody Name                                                            | Vendor                    | Cat Num.               | Proper Citation                                           | Clonality           | Host Organism |
|--------------------------------------------------------------------------|---------------------------|------------------------|-----------------------------------------------------------|---------------------|---------------|
| Purified anti-Tubulin -3 (TUBB3) Antibody                                | BioLegend                 | 802001                 | (BioLegend Cat# 802001, RRID: AB_2564645)                 | polyclonal antibody | rabbit        |
| Anti-Glial Fibrillary Acidic Protein, clone GA5 antibody                 | Millipore                 | MAB360                 | (Millipore Cat# MAB360, RRID: AB_11212597)                | monoclonal antibody | mouse         |
| Phospho-p44/42 MAPK (Erk1/2) (Thr202/Tyr204) (20G11) Rabbit mAb antibody | Cell Signaling Technology | 4376S                  | (Cell Signaling Technology Cat# 4376S, RRID: AB_331772)   | monoclonal antibody | rabbit        |
| Map Kinase, p44/42, Erk1/Erk2 antibody                                   | Cell Signaling Technology | 4695                   | (Cell Signaling Technology Cat# 4695, RRID: AB_390779)    | monoclonal antibody | rabbit        |
| Phospho-Akt (Thr308) Antibody                                            | Cell Signaling Technology | 9275 also 9275S, 9275L | (Cell Signaling Technology Cat# 9275, RRID: AB_329828)    | polyclonal antibody | rabbit        |
| Akt Antibody                                                             | Cell Signaling Technology | 9272 also 9272S        | (Cell Signaling Technology Cat# 9272, RRID: AB_329827)    | polyclonal antibody | rabbit        |
| Phospho-S6 Ribosomal Protein (Ser235/236) Antibody                       | Cell Signaling Technology | 2211 also 2211L, 2211S | (Cell Signaling Technology Cat# 2211, RRID: AB_331679)    | polyclonal antibody | rabbit        |
| GRP 78 (C-20) antibody                                                   | Santa Cruz Biotechnology  | sc-1051                | (Santa Cruz Biotechnology Cat# sc-1051, RRID: AB_2119994) | polyclonal antibody | goat          |
| Phospho-Stat3 (Ser727) Antibody                                          | Cell Signaling Technology | 9134 also 9134S, 9134L | (Cell Signaling Technology Cat# 9134, RRID: AB_331589)    | polyclonal antibody | rabbit        |
| Phospho-Stat-3 (tyr705) antibody                                         | Cell Signaling Technology | 9131 also 9131S, 9131L | (Cell Signaling Technology Cat# 9131, RRID: AB_331586)    | polyclonal antibody | rabbit        |
| Rabbit Anti-Stat3 Polyclonal antibody, Unconjugated                      | Santa Cruz Biotechnology  | sc-482                 | (Santa Cruz Biotechnology Cat# sc-482, RRID: AB_632440)   | polyclonal antibody | rabbit        |
| Mouse Anti-Glyceraldehyde-3-PDH                                          | Millipore                 | MAB374                 | (Millipore Cat# MAB374, RRID: AB_2107445)                 | monoclonal antibody | mouse         |

|                                                                                                                               |                                 |                |                                                                     |                     |        |
|-------------------------------------------------------------------------------------------------------------------------------|---------------------------------|----------------|---------------------------------------------------------------------|---------------------|--------|
| (GAPDH)<br>Monoclonal<br>antibody,<br>Unconjugate<br>d                                                                        |                                 |                |                                                                     |                     |        |
| Mouse<br>monoclonal<br>antibody to<br>human<br>MANF<br>(Mesenceph<br>alic<br>astrocyte-<br>derived<br>neurotrophic<br>factor) | Icosagen<br>AS                  | Icosagen AS    | (Icosagen AS Cat# 310-<br>100, RRID:<br>AB_11135308)                | polyclonal antibody | rabbit |
| Doublecortin<br>(C-18)<br>antibody                                                                                            | Santa Cruz<br>Biotechnolo<br>gy | sc-8066        | (Santa Cruz<br>Biotechnology Cat# sc-<br>8066, RRID:<br>AB_2088494) | polyclonal antibody | goat   |
| Mouse Anti-<br>Nestin<br>Monoclonal<br>antibody,<br>Unconjugate<br>d, Clone rat-<br>401                                       | Millipore                       | MAB353         | (Millipore Cat# MAB353,<br>RRID: AB_94911)                          | monoclonal antibody | mouse  |
| Sheep Anti-<br>BrdU<br>Polyclonal<br>Antibody,<br>Unconjugate<br>d                                                            | Abcam                           | ab1893         | (Abcam Cat# ab1893,<br>RRID: AB_302659)                             | polyclonal antibody | sheep  |
| Anti-NeuN,<br>clone A60<br>antibody                                                                                           | Millipore                       | MAB377         | (Millipore Cat# MAB377,<br>RRID: AB_2298772)                        | monoclonal antibody | mouse  |
| Anti-GFAP,<br>N-Terminal<br>antibody<br>produced in<br>rabbit                                                                 | Sigma-<br>Aldrich               | SAB450116<br>2 | (Sigma-Aldrich Cat#<br>SAB4501162, RRID:<br>AB_10746077)            | polyclonal antibody | rabbit |
| Mouse Anti-<br>NG2<br>Monoclonal<br>antibody,<br>Unconjugate<br>d, Clone<br>132.38                                            | Millipore                       | 05-710         | (Millipore Cat# 05-710,<br>RRID: AB_309925)                         | monoclonal antibody | mouse  |
| Rabbit Anti-<br>Green<br>Fluorescent<br>Protein<br>(GFP)<br>Polyclonal<br>Antibody,<br>Unconjugate<br>d                       | Thermo<br>Fisher<br>Scientific  | A-6455         | (Thermo Fisher Scientific<br>Cat# A-6455, RRID:<br>AB_221570)       | polyclonal antibody | rabbit |
